# Supplementary material
Source: PubMed Central journal article supplement (PMC10257752)

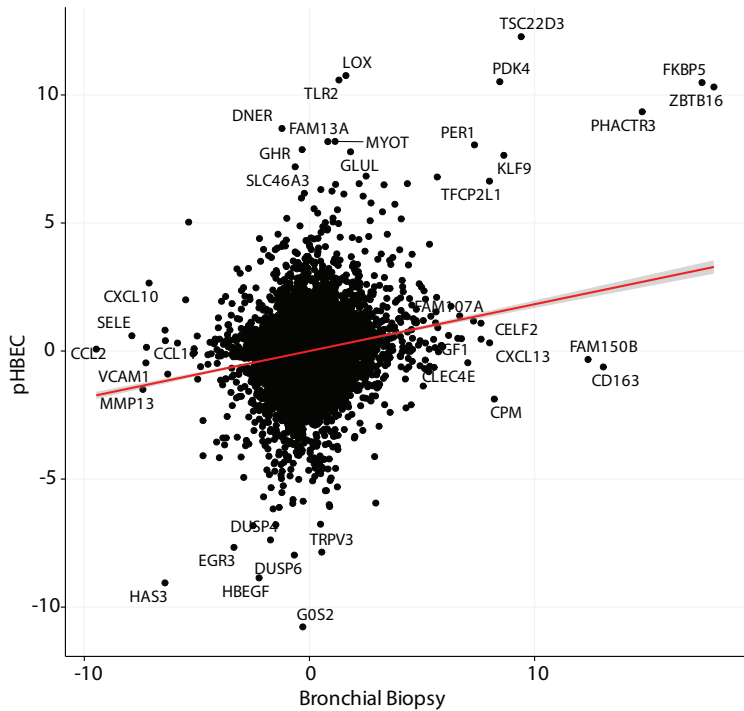

Supplement: NIHMS1875328-supplement-1.pdf [file NIHMS1875328-supplement-1.pdf]

A

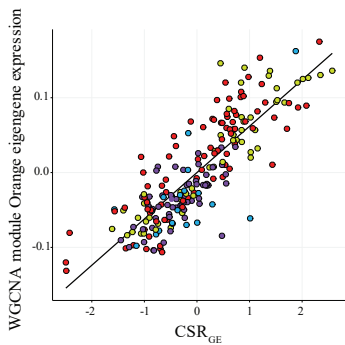

HC MA w/o CS MA w/ CS SA SA

C

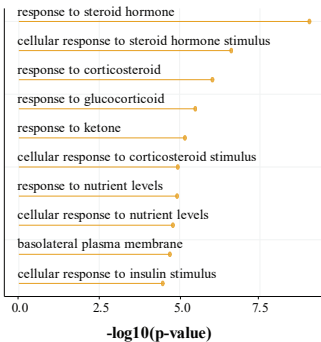

B

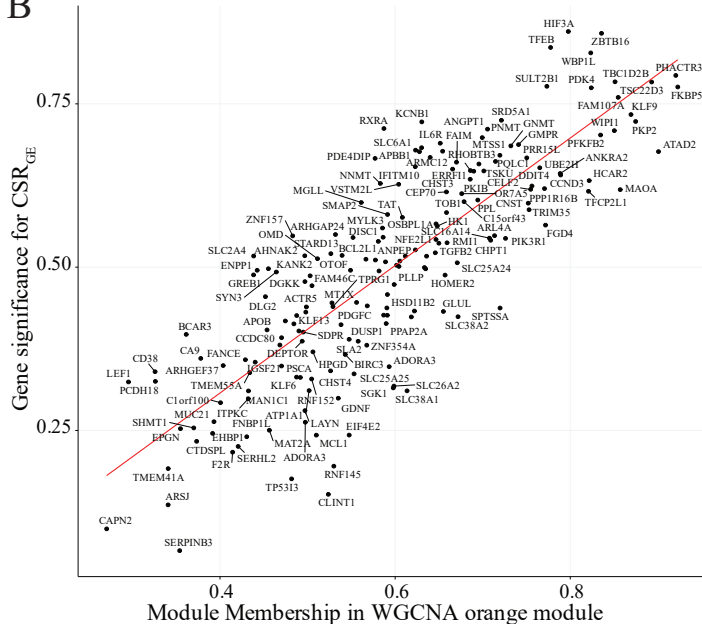

Supplement: NIHMS1875328-supplement-2.pdf [file NIHMS1875328-supplement-2.pdf]

A

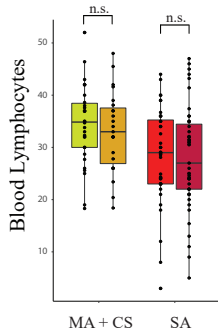

B

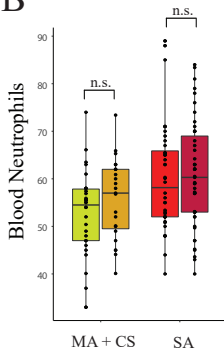

C

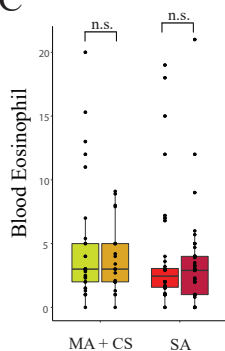

D

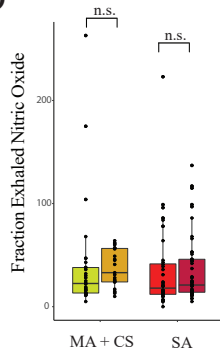

E

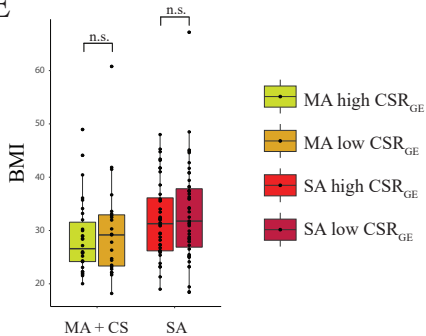

Supplement: NIHMS1875328-supplement-3.pdf [file NIHMS1875328-supplement-3.pdf]
